# Supplementary material for: Safety and Efficacy of Re-treating with Immunotherapy after Immune-Related Adverse Events in Patients with NSCLC
Source: Oxford University Press journal article supplement (doi:10.1158/2326-6066.cir-17-0755), 2018-07-10
Supplement: 23266066cir170755-sup-194582_2_supp_4859870_pb1vbg.docx [file 23266066cir170755-sup-194582_2_supp_4859870_pb1vbg.docx]

**eTable 3. Retreatment Cohort – Recurrent irAEs: Characteristics of The Recurrent Immune-Related Toxicity**

| **Recurrent irAE** | **Same irAE**  ***N* (%)** | **New irAE**  ***N* (%)** |
| --- | --- | --- |
| Total | 10 (50) | 10 (50) |
| Type irAE: |  |  |
| Pneumonitis | 1 (10) | 2 (20) |
| Colitis | 2 (20) | 3 (30) |
| ALT/AST elevation | 1 (10) | 2 (20) |
| Arthralgia/Myalgia | 3 (30) | 1 (10) |
| Rash/Pruritus | 1 (0) | 1 (10) |
| Neuropathy | 0 (0) | 1 (10) |
| Ventricular arrhythmias | 1 (10) | 0 (0) |
| Nephritis | 1 (10) | 0 (0) |
| Grades of the recurrent irAE |  |  |
| Grade 1 and 2 | 4 (40) | 8 (80) |
| Grade 3 and 4 | 6 (60) | 2 (20) |
| Corticosteroid |  |  |
| Oral | 7 (70) | 4 (40) |
| Intravenous | 2 (20) | 2 (20) |
| Steroids > 4 weeks | 5/9 (55) | 5/6 (83) |
| Anti-TNF | 0 (0) | 2 (20) |
| irAEs resolved to: |  |  |
| Grades 0 and 1 | 9 (90) | 8 (80) |
| Grades >= 2 | 1 (10) | 2 (20) |
| Deaths related to irAE | 0 (0) | 2 (20)  Pneumonitis  Colitis |

NOTE. Data presented as No. (%) unless otherwise noted.

Abbreviations: ALT, alanine aminotransferase; AST, aspartate aminotransferase; Anti-TNF, anti-tumor necrosis factor alpha.
