# Supplementary material for: Safety and Efficacy of Re-treating with Immunotherapy after Immune-Related Adverse Events in Patients with NSCLC
Source: Oxford University Press journal article supplement (doi:10.1158/2326-6066.cir-17-0755), 2018-07-10
Supplement: 23266066cir170755-sup-194582_2_supp_4859871_pb1vbg.docx [file 23266066cir170755-sup-194582_2_supp_4859871_pb1vbg.docx]

**eTable 1. Patients with Advanced NSCLC Treated at MSKCC with Immunotherapy From April 2011 to May 2016**

|  | ***N* (%)** |
| --- | --- |
| No. of patients | 482 |
| Median age, years (range) | 65 (31-94) |
| Sex, female | 246 (51%) |
| Smoking history |  |
| Yes | 393 (81.5%) |
| No | 89 (18.5%) |
| Histology |  |
| Adenocarcinoma | 374 (78%) |
| Squamous | 85 (17%) |
| LCNEC + NOS | 23 (5%) |
| Single agent v combination |  |
| Anti-PD-1 | 372 (78%) |
| Anti-PD-L1 | 60 (12%) |
| Combination | 50 (10%) |
| Line of therapy |  |
| First | 118 (24%) |
| Second | 187 (39%) |
| >=3 | 177 (37%) |
